# Supplementary material for: Development of a winter wheat model in the Community Land Model(version 4.5)
Source: Copernicus journal article supplement (doi:10.5194/gmd-2016-245), 2016-10-12
Supplement: Supplementary file [file gmd-2016-245-AC1-supplement.pdf]

Dear Christoph,

Below please find responses to each review comment, including details of how we will modify the manuscript to address reviewer requests. Major changes include revisions to the introduction to more clearly articulate the aims of our work and its expected value to the scientific community, additional site validations to help with interpreting model-data comparisons.

We look forward to the opportunity to submit a revised manuscript.

Sincerely,  
Yaqiong Lu

## Review 1

Review for “Development of a winter wheat model in the Community Land Model (version 4.5)” by Lu et al. Summary: Lu et al. updated the winter wheat model in the Community Land Model (CLM) to better simulate wheat growth and grain production, including schemes to represent vernalization and frost tolerance. They also validated the model with three observation data and then applied the updated model on regional scale. The topic is interesting, but I have a few questions about the method and some comments as listed below.

Comments:

1. The title “Development of a winter wheat model...” indicates a new wheat model was implemented in the CLM. As far as I understood, they just updated vernalization and frost schemes.

Previously, when the crop models in CLM were developed, a wheat scheme was implemented, however this scheme did not allow for winter crops (crops planted in fall for late spring harvest). Our work created this capability building off of the pre-existing wheat model code. To acknowledge the earlier wheat model development, we have modified the title to “Representing winter wheat in the Community Land Model (version 4.5)”

2. In abstract, they claim that they calibrated the three key parameters. But I did not see how they did the calibration and which data they used to calibrate. What is the difference between the calibrated model and the model with the default setting?

We calibrated the phenology and CN allocation parameters to achieve good representation of US-ARM site measurements of LAI and yield, and tested the calibrated model using independent data sets from three other eddy flux sites (US-Pon, US-CRT, CAF-CT) and five additional winter wheat sites which have data on LAI, biomass, and grain weight.

To clarify, we added two sub-sections to the revised methods section (calibration data and validation data), to more clearly state the data used for calibration and validation. We showed in Table 4 the values of the parameters for the calibrated model (CLMWHE) and the model with default setting (CLMBASE). Only three of the parameters are different between CLMWHE and

CLMBASE and we indicated these modified parameters with superscript \*.

We added a paragraph in the revised manuscript to clarify how we calibrated the model:

“After the above modification of CN allocation and addition of the new vernalization and frost damage processes, we calibrated three parameter values (indicated with \* in Table 4) in the US-ARM simulation. We adjusted minimum planting temperature and maximum days for growing to better match the US-ARM site planting and harvest date, and adjusted the initial leaf carbon allocation coefficient to better match the US-ARM LAI and yield.”

3. The implemented schemes (vernalization and frost tolerance) are the key contribution of this paper. However why they decided to choose the algorithm presented in this study is not clear for me as a number of the algorithm exists. Ideally, it would be great that they can validate these two schemes specifically instead of only validating the model in general.

We chose these algorithms because they were developed as generalized standalone models that could be easily added into CLM. Vernalization and frost tolerance (Equation 1 to 10) are based on previously developed models that have already been calibrated and tested against growth chamber or site measurements. We understand that in model coupling, calibration of some parameters may be necessary even if those parameters were previously calibrated on their own. For example, when Levis et al., (2012) coupled the crop growth module from AgroIBIS into CLM, they calibrated the phenology and carbon allocation parameters because other processes (e.g., soil hydrology, radiation, photosynthesis) in CLM were quite different from AgroIBIS. These different processes resulted in an unexpected crop growth when using the same parameters as in AgroIBIS. But this is not the case for our coupling of vernalization and frost tolerance processes into CLM. These two processes mainly rely on the air temperature and snow, which are largely dependent on the atmospheric forcing for the offline simulation. So the previous calibrations on the empirical functions should be valid for the coupled model.

4. In terms of frost damage, it is a very good point of this paper as climate extreme events are more frequent. However, they did not really show the improvement of the new frost scheme in predicting the frost events and quantify the damage of the frost. It would promote the paper into a higher level if authors can validate and quantify the frost damage in plot scale, especially quantify the damage in region scale simulation.

For frost damage, we don't have specific measurements of tissue biomass at the four flux tower sites. We did a literature search on how other winter wheat models validated their frost damage algorithms, but didn't find any validations of this specific process. We've contacting several agronomic groups for field experiments that made specifically for the frost damage, and didn't get luck. But we did get five winter wheat sites reformatted and used by the AgMIP-Wheat project. These sites have detailed crop growth measurements (e.g., leaf area index, leaf, stem, and grain weight). We added the validation at the five sites for leaf area index, leaf, stem, and grain weight to show the performance of the model.

Following the reviewer's suggestion, we quantified the effect of frost damage on U.S. winter

wheat LAI and yield through a sensitivity analysis. We compared two US domain simulations with the updated winter wheat model: one with the active frost damage function, and the other with the frost damage function turned off. These supporting results will be added to the revised manuscript, along with the following text:

“We quantified the US domain frost damage impacts on LAI and yield through two CLMWHE simulations, with and without the frost damage function. Frost damage resulted in lower LAI and yield, with spatial variation across the U.S. For the domain average, frost damage reduced LAI by 27% (or 1.69 m<sup>2</sup>/m<sup>2</sup>) and reduced yield by 28% (or 0.5 ton/ha). The greatest reduction (>45%) in LAI occurred in Texas and the southeastern US. LAI in the cold northern US regions had less impact (<15%) from frost damage. The damage effect on yield was not always geographically consistent with the LAI damage. The northern Great plains and Midwest had greater percentage reductions (>45%) in yield than reductions in LAI (< 15%).”

5. The manuscript could be better if authors can tighten the introduction. From results and discussion, I think the updating and validating of the model to estimate grain production are focus this paper, but they discussed a lot of the importance of carbon emission, energy and water exchange etc. Adding introduction about the importance growth stages would be very helpful. This may link to your decision why you want to focus on updating vernalization and frost schemes and ignore other processes.

We had at least two reasons for representing winter wheat in CLM, (1) the importance of winter wheat as a land cover type (particularly in the Southern Great Plains of the U.S.), and its seasonally unique control on carbon, energy and water exchange with the atmosphere and climate; and (2) the distinct importance of winter wheat (vs spring wheat) in contributing to regional and global crop productivity and yield, and differences in its sensitivity to climate variability and extremes. We will revise the introduction to better motivate the importance of representing winter wheat energy, water and carbon exchange, as well as yield and the sensitivity of yield to vernalization and frost.

6. In the introduction, they discuss a couple of the wheat models from plot to region scale. But what are the issues or challenges of these models? How they address these issues is not clear.

The primary challenge is in representing the unique phenology of winter wheat when coupled to a biochemical (as opposed to light-use efficiency) model of photosynthesis. This includes representing vernalization and cold tolerance. A secondary challenge is representing winter wheat productivity and yield at regional and global scales, as opposed to optimizing a model for local conditions.

Our revised introduction will include additional background on how these challenges have been addressed in crop models, and how they can be implemented the land-surface models used in Earth system models.

7. It is also important to note that they did not really validate the model with yield data even they use the model to simulate the wheat yield on regional scale. It would be much more convincing if the model validated on plot scale with grain production data.

The reviewer must have overlooked the yield validation. For the flux tower sites, we had measured yield at the US-ARM site, but did not have yield information at the other three sites. Therefore, we compared modeled yield to the county yield data, which we found was consistent with the site-based measurements at US-ARM. We updated figure 5 to show the ARM site yield observation. To further address the comment, we evaluated the model against independent data from an additional five winter wheat sites, to validate prediction of LAI, leaf, stem, and grain weight. And the results showed our model could well represent the temporal and spatial variation for winter wheat growth at these new sites.

8. My last comment is that updating the CLM-wheat model is important, but not very new topic as this kind of job has been done for some land surface models such as JULES, ORCHDEE and BIO-BGC model. In short, this manuscript potentially is publishable, but it needs a number of modifications. Hence I would suggest a major revision.

CLM is one of the most widely used land surface models. Not having a valid winter wheat model constrained its utility for studying interactions among climate, land use and agriculture at regional to global scales. We further developed and validated the winter wheat model in CLM to help the CLM community better understand the effects of crop growth on water and energy exchange, and to contribute more fully to international projects concerned with effects of climate variability and change on agriculture, such as AgMIP. In revising the introduction, we will better call out the approaches of the other land surface models mentioned and note how our approach is similar/different.

## **Review 2**

The paper contributes to an interesting and important question: How to improve wheat growth models for a better prediction of future global grain production? For this purpose the paper addresses in particular the question how to better simulate leaf area growth of winter wheat. It reports on the update of an existing crop growth model to the actual state of the art of describing vernalization, frost tolerance and damage, and on an improved parameterization of carbon allocation to leaf and stem. The improved model is tested considering data sets from four different sites and up to six different winter seasons for each site across the USA representing different climatic conditions.

Generally I have difficulties to understand the focus of the paper: Is it the test of the proposed model update by comparison with data on frost impact on winter wheat growth and carbon allocation at the plot scale (fig.2-4), or is it a general comparison with simulation results between the old (CLMBASE) and the new (CLMWHE) model at the US wide scale (fig.6-7) to show improvements?

The focus of the paper is to add representation of winter wheat into CLM. We compared the results our new code (CLMWHE) to the baseline model simulations (CLMBASE) to show the improvements over the original model, which did not include valid winter wheat and therefore

had biases in land-atmosphere exchange of energy and water, and also compared the new code to observations to show the strengths and limitations of the model. We will revise the introduction to reflect our dual aims of representing the unique effects of winter wheat on land-atmosphere energy and water fluxes (and therefore climate) and the productivity and yield of winter wheat as an important grain crop, including its vulnerability to frost damage.

In the abstract the authors promise a validation of the updated model, but in my view the data sets for testing the simulation of leaf development (as dependent on vernalization and frost) are not sufficient to evaluate the presented algorithms of process descriptions (eq. 1-12): Although figures (fig.2) show for the sites US-ARM and US- PON improved LAI simulations, it is difficult to understand why this is the case: It should be carefully analysed if the improvement is based on a now more adequate description of frost damage/tolerance and/or on a more accurate description/parametrisation of carbon allocation to the leaves.

As noted above, the vernalization and frost tolerance parameterizations were previously calibrated and tested .. (see our detailed response to Reviewer 1 Comment 3 and 4 above)

We have conducted an additional set of simulations to isolate, for monthly LAI, the effects of each change. However, vernalization and frost damage code interact with each other in nonlinear ways. And the parameters were calibrated after adding the vernalization and frost damage, so it not make sense to use them separately.

With the additional winter wheat site validation of leaf, stem, and grain weight, we found vernalization played the most important role in simulation the crop growth seasonal cycles due to its controls on the growing degree days and phenology shifts, and the cold damage also played a role in simulation of a reasonable winter time LAI and leaf weight, but not affecting the phenology.

Also, it is not clear to me if the test is performed using independent data sets which are not used for model parametrisation (in respect to both LAI and yield data): It would be helpful for the reader if the authors clearly indicate which data are used for model parametrisation and which data for model testing.

In the revised method section, we split the site description into calibration data and validation data sections. And clearly stated what are the calibration data and what are the validation data.

In summary, the paper could be considerably improved, if the proposed model update (eq. 1-12) is tested by data that are directly related to the underlying model mechanisms, i.e. by data on vernalization, frost damage and frost tolerance and by data on carbon allocation to leaves, stems and roots. Since both the model update and the allocation scheme are not new and the coupling of crop growth models to land surface models such as CLM has been successfully achieved already by different research groups, the paper would gain scientific value by a more thorough test.

As noted above, we adopted algorithms for vernalization and frost damage that were already carefully developed and validated with data that we don't have access to. We will extend our validation to leaf, stem, grain weight at an additional five winter wheat sites in the revised

manuscript.

In conclusion, the paper needs a total revision to ensure that the objective is met, i.e. of assessing the value of a more detailed description to improve model application at field and regional scale studies. In its present form the paper should not be published (see also special remarks).

Prior to our work, CLM did not have a valid winter wheat model. Our contribution to the literature and to the modeling community is to describe our new representation of winter wheat in CLM so that the community can understand and use the model for their scientific objectives. Revisions to the introduction will make this more explicit.

Special remarks:

p=page, l=line

p=3 l=93 : Is the model you use for update the same as the AgroIBIS model?

If not, which are the differences?

CLM crop growth only adopted the crop phenology and carbon allocation from Agro-IBIS, and did not include other processes in Agro-IBIS (e.g., hydrology, belowground nitrogen dynamics, radiation). The parameters in crop phenology and carbon allocation have different values from Agro-IBIS with calibrations described in Levis et al., 2012.

l=106 : Please insert the year: ... Levis et al. (2012)...

Inserted year

l=107 : "has never been validated": at which scale? was the the AgroIBIS never tested?

Prior to our work, CLM did not represent winter wheat - all wheat was spring wheat. To our knowledge, AgroIBIS was never validated at winter wheat sites, and even if AgroIBIS had been validated for winter wheat, winter wheat code and parameterizations were not implemented in CLM. This sentence will be revised to avoid confusion.

l=136 : Williams and Torn (2015) is not in the list of references.

added

p=4 l=142 : Are there data on possible frost damage included?

No, the site has no specific measurements on frost damage.

p=5 l=165-166 : Are these algorithms used in parallel?

The algorithms could be used in serial or parallel. CLM can support single point simulations, regional simulations, and global simulations. The single point simulation is a serial job, while the regional and global simulations can be run in parallel, where the domain is divided into sub regions, and run on multiple processors.

l=172 : Why are exactly these depths considered?

These depths were considered the top soil layer that affects seed germination most.

p=7 l=242 : ... *LT50*...

Modified to Italics font.

l=274 : ... *LT50*...

Modified to Italics font.

p=8 l=310 : ... be likely to suffer as much from ...

Modified

p=9 l=336 : ... the approach resulted in a rapid decline of ...

Modified

p=10 l=361 : Was this performed for both models in the same way?

The spinup for CLMWHE and CLMBASE are quite similar. We used the same spin up from the new model (CLMWHE) as the initial condition for consistency.

l=378 : How long is a longer time?

Hundreds years (see table S1).

p=11 l=404 : Was this really achieved by better simulation of vernalization and frost damage?

Vernalization played the most important role in simulating the seasonal cycle of crop growth due to its control on growing degree days and phenological stage. Cold damage also played a role in simulation of a reasonable winter time LAI and leaf weight.

p=12 fig.2 : Why are there no error bars for CLMBASE? Was the lower observed LAI due to frost damage? Did you simulate some damage?

US-ARM and US-PON have error bars (very small) for CLMBASE. US-CRT and CAF-CT only have one year so there are no error bars for both CLMBASE and CLMWHE.

It hard to say whether the lower observed LAI at US-PON is due to frost damage or not, we did simulate slightly damage (LAI reduction  $< 0.3 \text{ m}^2/\text{m}^2$ ).

p=13 l=458-461 : Legend of fig.3: "CLMCWHE" is this another model or is this a typo?

We corrected the typo.

p=14 l=498-500 : But now you may underestimate spring evaporation as strongly as you overestimated in later months. Please discuss in the discussion section.

We will add to the discussion:

“We found that although the new soil evaporation parameterization (Swenson and Lawrence, 2014) in a later version of CLM reduced soil evaporation and improved the summer and fall LE simulation (Figure 4), it also reduced spring soil evaporation (Figure 4b) and induced an even lower spring LE. If we assume this reduction in soil evaporation is reasonable, then further improvement of the LE simulation needs to be focused on increasing the leaf transpiration and correcting the inconsistent peak time between leaf transpiration and LAI.”

Moreover, observed times of LAI peaks are the same as LE peaks, at both sites, where you have observations! Therefore, I don't understand l=498-500.

In the observation, LE peaks at the same time as LAI peaks in April. But in the CLMWHE simulation, simulated LE peaks in May while simulated LAI peaks in April. The new soil evaporation scheme still has not solved the inconsistent LE-LAI peak problem. Here we simply stated that the LE peaks in May due to the fact that one of its components, leaf transpiration, peaks in May.

p=15 l=515 : bu/ac? Please use SI units throughout the paper.

We changed the yield unit from bu/ac to ton/ha.

p=17 fig.6 : Could you compare with CLMBASE simulation? Is there an improvement compared to CLMBASE simulations and compared to US yield statistics?

We added figure 6c to show the CLMBASE US simulation. CLMWHE (Figure 6b) showed a better US yield estimation (RMSE reduced by 24%) than CLMBASE (Figure 6c).

p=18 l=581-582 : Is this really an improvement, if you don't know that you simulate the processes correctly? In my view you should have compared with observed data to justify such a statement.

As we mentioned earlier, there is no need to validate the vernalization and cold tolerance functions independently because they've been previously validated. We could not fully validate the frost damage function due to observation limitations. But using data from additional winter



wheat sites we were able to further validate leaf, stem, and grain weight. We found that vernalization played the most important role in simulating the seasonal cycle of crop growth due to its control on growing degree days and phenological stage. Cold damage also played a role in simulation of a reasonable winter time LAI and leaf mass.

p=19 l=617 : (Williams and Torn ... Please insert bracket and year of publication.

Added.

l=636 : There is overestimation for US-ARM and US-PON, see fig.5

Please correct your sentence: tends to underestimate

US national average.

Corrected.
